# Supplementary material for: Solvothermal syntheses of lanthanide thiogermanates displaying three new structural moieties
Source: Royal Society of Chemistry journal article supplement (doi:10.1039/c4ra07812h), 2014-08-19
Supplement: c4ra07812h1.pdf [file c4ra07812h1.pdf]

## Solvothermal syntheses of lanthanide thiogermanates displaying three new structural moieties

Rong-Qing Zhao, Jian Zhou, Xing Liu, Li Zhang, Qiu-Ling Tang and Xiao-Feng Tan

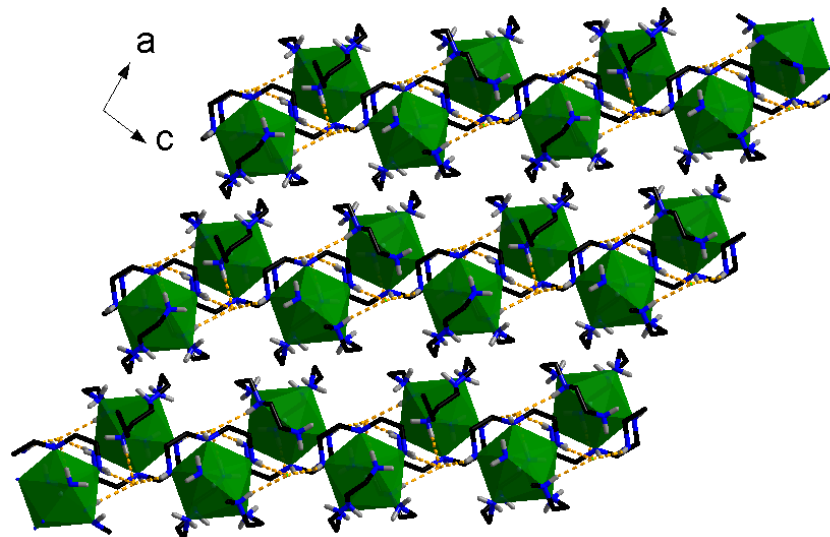

Fig. S1 The stacking mode for the layers in **Ia**.

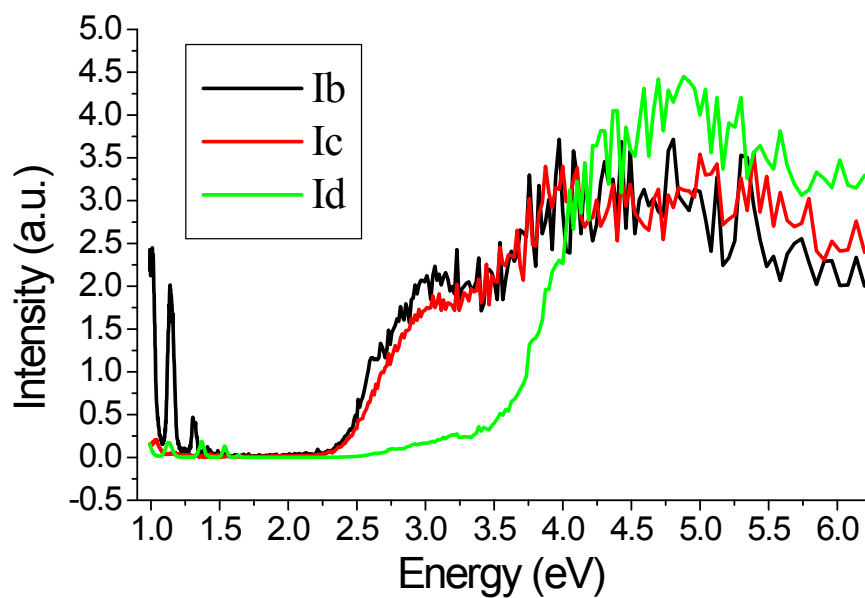

Fig. S2 The solid-state UV-vis absorption spectra of **Ib-d**.

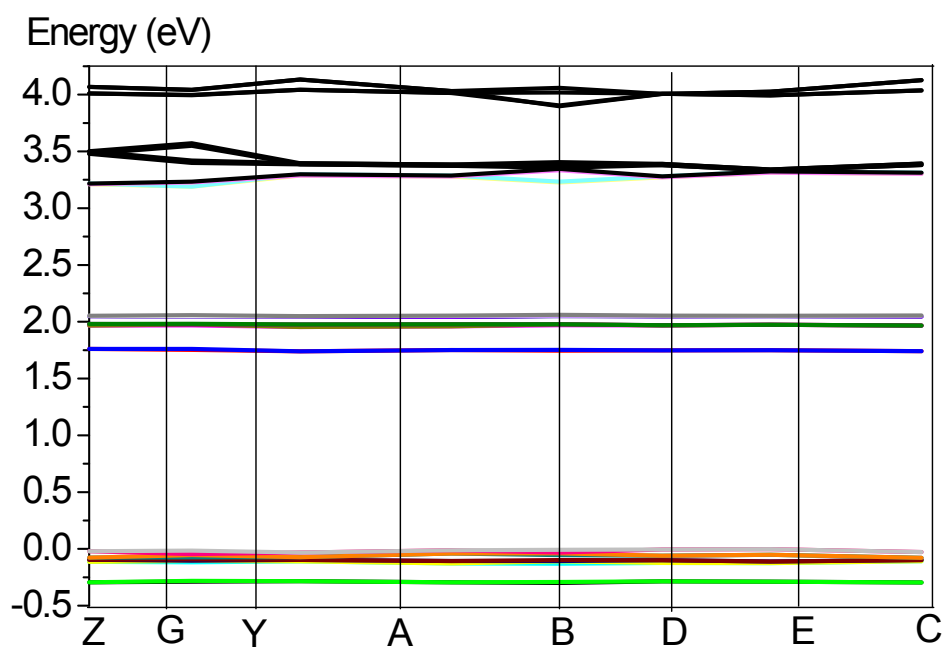

Fig. S3 Calculated band structure of **III**, the Fermi level is set at 0.0 eV.

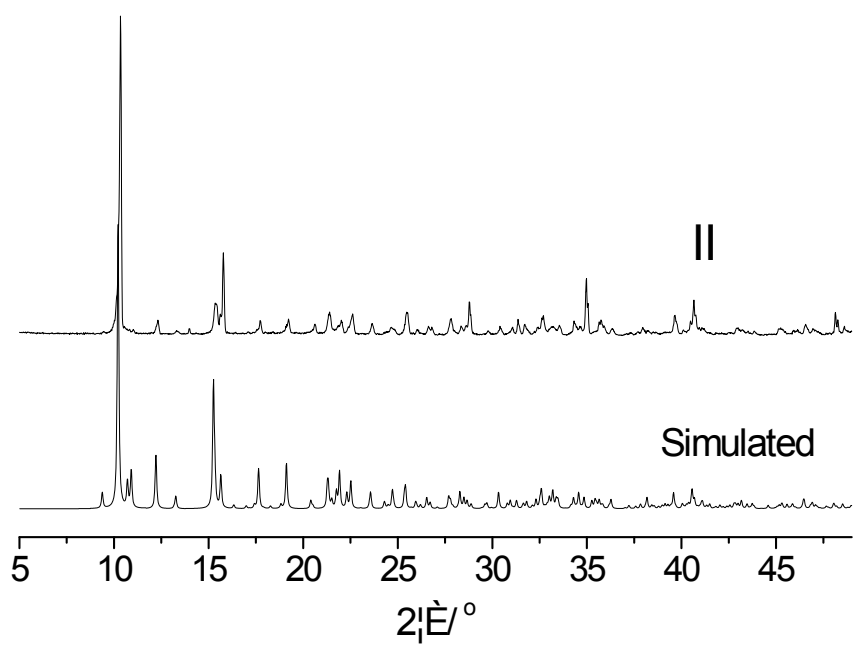

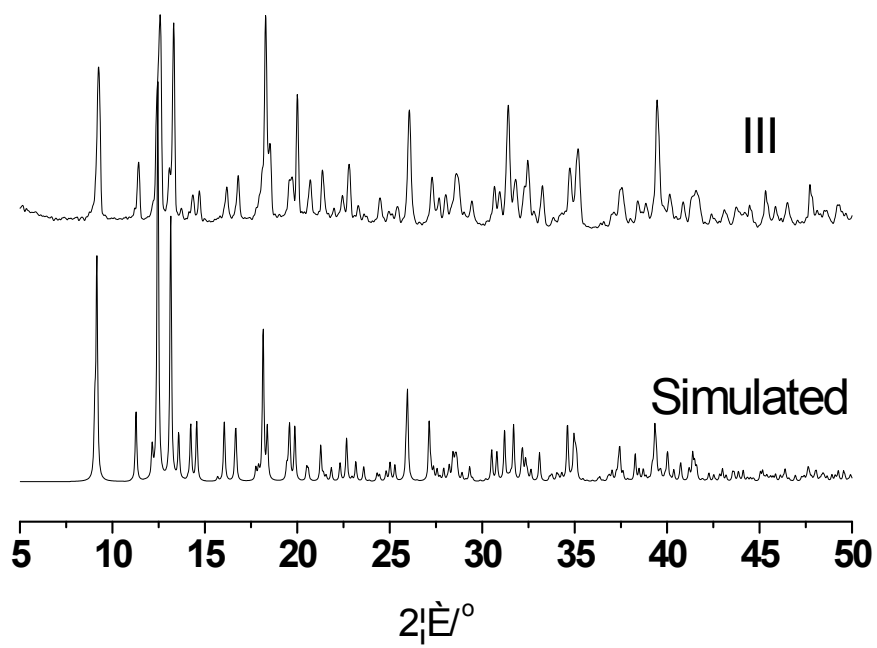

Fig. S4 Simulated and experimental powder XRD patterns of **II** and **III**.
